# Supplementary material for: Semantic segmentation of gonio-photographs via adaptive ROI localisation and uncertainty estimation
Source: PubMed Central journal article supplement — BMJ Open Ophthalmol. 2021 Nov 25;6(1):e000898. doi: 10.1136/bmjophth-2021-000898 (PMC8627415; doi:10.1136/bmjophth-2021-000898), 2021-11-25
Supplement: bmjophth-2021-000898supp001.pdf [file bmjophth-2021-000898supp001.pdf]

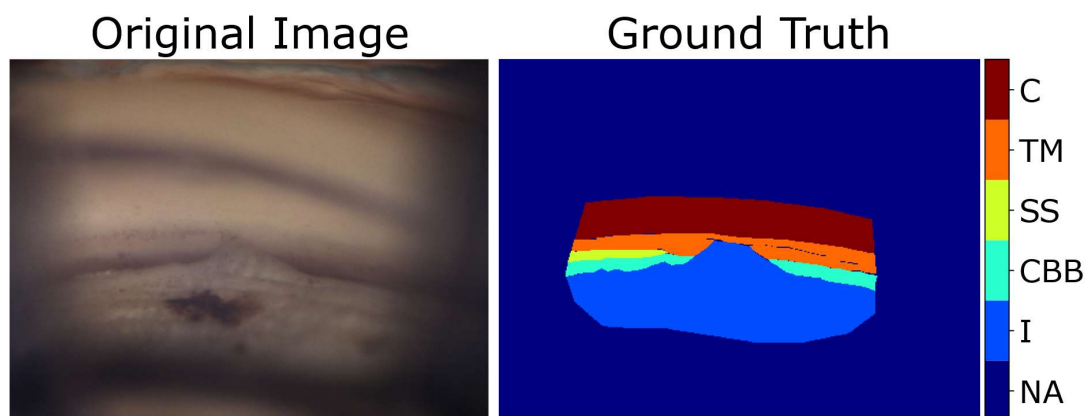

Supplemental Material Figure 1: example of original gonio-photograph (left) and annotation provided by a clinical expert (right). A large area of the original image was difficult to annotate with confidence and was left un-annotated (label NA). Annotated and un-annotated image regions may share similar features and the boundary between them is subjective.

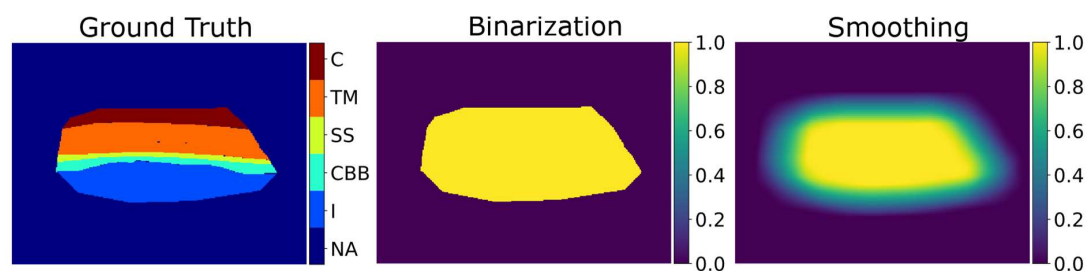

Supplemental Material Figure 2: example of ROI likelihood map generation. The semantic ground truth (left) is binarized first (annotated region = 1; un-annotated region = 0) and gaps between adjacent layers are filled-in (centre). The binarized image is then smoothed to simulate a distribution of clinician's confidence when annotating the image and obtain the final ROI likelihood map (right) that will be used to train the ROI Decoder.
